# Supplementary material for: Paired 14 C- 10 Be exposure ages from Mount Murphy, West Antarctica: Implications for accurate and precise deglacial chronologies
Source: Copernicus journal article supplement (doi:10.5194/gchron-2024-34), 2024-12-09
Supplement: Supplementary file 1 [file gchron-2024-34-supplement.zip]

## Sheet: Table S1
																								Lifton et al., (2014) LSDn Scaling method
TUCNL*	Sample ID	BAS ID	Aliquot	AMS Lab	AMS ID	Quartz Mass	C yield	±1σ	Diluted Gas Mass	±1σ	¹⁴C/¹³C corrected	±1σ	δ¹³C	±1σ	¹⁴C/C total	±1σ	total ¹⁴C atoms	±1σ	¹⁴C conc.	±1σ	±6% $	Blank applied	±1σ	¹⁴C age	±1σ int	±1σ ext
						(g)	(μg)	(μg)	(μg)	(μg)			(‰)	(‰)			blank corrected	(atoms)	(atoms g⁻¹)	(atoms g⁻¹)	(atoms g⁻¹)	(atoms)	(atoms)	(ka)	(ka)	(ka)
647	CIN-108	R15.8.8	a	NOSAMS	OS-160557	5.0795	5.9	0.1	113.7	1.5	8.29e-12	8.49e-14	-2.77	0.5	9.11e-14	9.33e-16	474000	8840	93290	1740	5597	45300	2380	6.3	0.6	0.7
649	TUR-132	R15.3.19	a	NOSAMS	OS-160560	5.1079	7.3	0.1	113.2	1.4	1.21e-11	1.14e-13	-3.29	0.5	1.33e-13	1.26e-15	709000	12200	138900	2396	8334	45300	2380	7.9	0.8	1
651	NOT-107	R15.16.7	a	NOSAMS	OS-160561	4.8866	3.6	0	112.7	1.4	1.26e-11	1.14e-13	-2.43	0.5	1.38e-13	1.26e-15	736000	12500	150700	2559	9042	45300	2380	5.2	0.4	0.6
652	TUR-123	R15.6.3	a	NOSAMS	OS-160562	5.015	3.6	0	112.3	1.4	8.68e-12	9.91e-14	-2.1	0.5	9.54e-14	1.09e-15	492000	9520	98110	1899	5887	45300	2380	3.8	0.3	0.4
658	CIN-112	R15.8.12	a	NOSAMS	OS-160566	5.0172	4.5	0.1	114	1.5	5.53e-12	6.97e-14	-4.39	0.5	6.07e-14	7.65e-16	302000	6670	60130	1330	3608	45300	2380	3.4	0.3	0.3
659	CIN-102	R15.8.2	a	NOSAMS	OS-160567	5.0109	19.2	0.2	114.7	1.5	1.05e-11	1.14e-13	-5.12	0.5	1.15e-13	1.25e-15	618000	11400	123300	2270	7398	45300	2380	9	1	1.3
660	NOT-104	R15.16.4	a	NOSAMS	OS-160568	5.0631	2.9	0	114.1	1.5	1.09e-11	8.55e-14	-4.05	0.5	1.2e-13	9.39e-16	641000	10600	126500	2087	7590	45300	2380	4.1	0.3	0.4
661	TUR-117	R15.3.17	a	NOSAMS	OS-160570	5.0861	2.6	0	113.6	1.5	6.42e-12	7.01e-14	-4.05	0.5	7.05e-14	7.7e-16	356000	7160	70020	1408	4201	45300	2380	3.1	0.2	0.3
664	NOT-103	R15.16.3	a	NOSAMS	OS-160572	4.9487	2.6	0	84.1	1.1	1.34e-11	1.14e-13	-3.51	0.5	1.47e-13	1.25e-15	574000	9820	115900	1983	6954	45300	2380	3.8	0.3	0.4
810	TUR-132-R	R15.3.19	b	NOSAMS	OS-166822	4.7504	5.2	0.1	104.3	1.3	1.19e-11	1.24e-13	-3.79	0.5	1.31e-13	1.36e-15	629000	11900	132400	2513	7944	71400	3040	7.4	0.7	0.9
811	TUR-117-R	R15.3.17	b	NOSAMS	OS-166823	4.8114	4.1	0.1	104.6	1.3	1.27e-11	1.1e-13	-3.69	0.5	1.39e-13	1.21e-15	677000	12000	140600	2485	8436	71400	3040	8.2	0.8	1.1
813	CIN-108-R	R15.8.8	b	NOSAMS	OS-166825	3.5139	5.5	0.1	104.9	1.3	7.59e-12	8.94e-14	-3.94	0.5	8.33e-14	9.8e-16	377000	8370	107300	2382	6438	71400	3040	7.8	0.8	1
814	CIN-112-R	R15.8.12	b	NOSAMS	OS-166827	3.0319	5.6	0.1	104.8	1.3	6.45e-12	8.16e-14	-3.79	0.5	7.08e-14	8.95e-16	310000	7500	102100	2474	6126	71400	3040	7.2	0.7	0.9
Sample quartz mineral separates were prepared at the CosmIC laboratory, Imperial College London. In situ ¹⁴C extractions were performed at Tulane University, New Orleans. δ¹³C analyses were performed at UC Davis, California. AMS analyses were performed at NOSAMS, Woods Hole Oceanographic Institute.
Exposure ages were calculated using the Version 3 of the University of Washington online cosmogenic exposure age : (https://hess.ess.washington.edu/) with the "LSDn" production rate scaling method for neutrons, protons and muons following Lifton et al., (2014).
* Sample ID number assigned at Tulane University in situ ¹⁴C extraction facility
$ Nominal 6 % (1σ) uncertainty applied to each in situ ¹⁴C measurement concentration reported by AMS and subsequently propagated into exposure age uncertainties. This value reflects the reproducibility of in situ ¹⁴C measured in CRONUS-A intercomparison material at Tulane.
