# Supplementary material for: Paired 14 C- 10 Be exposure ages from Mount Murphy, West Antarctica: Implications for accurate and precise deglacial chronologies
Source: Copernicus journal article supplement (doi:10.5194/gchron-2024-34), 2024-12-09
Supplement: Supplementary file 3 [file Table S2.xlsx]

## Sheet: Table S2
Sample ID	BAS ID	Latitude	Longitude	Altitude	Thickness	Lithology	Sample Density	Shielding Factor	Date of Collection
		DD	DD	(m a.s.l.)	(cm)		(g cm⁻²)		(yr)
CIN-108	R15.8.8	-75.2165	-111.02	181	3.3	granite	2.7	0.9994	2015
TUR-132	R15.3.19	-75.383	-111.309	446	2	granite	2.7	0.9996	2015
NOT-107	R15.16.7	-75.3882	-111.091	885	3.5	granite	2.7	0.9984	2015
TUR-123	R15.6.3	-75.3706	-111.292	639	2.9	granite	2.7	0.9933	2015
CIN-112	R15.8.12	-75.2163	-111.018	179	2.8	aplite	2.7	0.9994	2015
CIN-102	R15.8.2	-75.2194	-111.023	239	3.1	gneiss	2.7	0.9989	2015
NOT-104	R15.16.4	-75.3886	-111.118	893	5.5	granite	2.7	0.9981	2015
TUR-117	R15.3.17	-75.3811	-111.307	451	3.7	granite	2.7	0.9993	2015
NOT-103	R15.16.3	-75.3914	-111.14	852	4.7	granite	2.7	0.9981	2015
Note: samples CIN-108, CIN-112, TUR-117 and TUR-132 were measured twice for C-14, and so there are 13 sets of analyses in the corresponding AMS data sheet (Table S1).
